# Supplementary material
Source: ML conference proceedings conference paper supplement (https://openaccess.thecvf.com/content/ICCV2025/html/Yi_Adapt_Foundational_Segmentation_ICCV_2025_paper.html)
Supplement: Supplementary file 1 [file ActionSpaceTable.pdf › Augment2AdaptSupplimentaryMaterial/ActionSpaceTable.pdf]

|                               | <b>Image Processing</b>             |                                  | <b>Description</b>                                |
|-------------------------------|-------------------------------------|----------------------------------|---------------------------------------------------|
| <b>Learning-based Methods</b> | Depth Map Estimation (DPE) [?]      |                                  | Estimate relative distance of images              |
|                               | Normal Surface Estimation (NSE) [?] |                                  | Estimate Normal Surface of images                 |
|                               | Albedo Map Estimation (AME) [?]     |                                  | Estimate Diffuse Albedo of images                 |
|                               | Roughness Map Estimation (RME) [?]  |                                  | Estimate Roughness of images                      |
|                               | Edge Detection (EGD) [?]            |                                  | Detect Boundaries of images                       |
|                               | Binarization (BIN) [?]              |                                  | Make images only black and white                  |
|                               | Illuminance Enhancement (RBU) [?]   |                                  | Recover images from dim light                     |
|                               | Image Demoiréing (IDM) [?]          |                                  | Remove moiré pattern                              |
|                               | Image Deblurring (IDR) [?]          |                                  | Recover images from blurry                        |
|                               | Absolute Depth Estimation (ADE) [?] |                                  | Estimate absolute distance of images              |
| <b>Rule-based Methods</b>     | Brightness (BE/BR)                  | Value: [0.1, 1.9]                | Increase or Decrease Brightness                   |
|                               | Contrast (CE/CR)                    | Value: [0.1, 1.9]                | Increase or Decrease Contrast                     |
|                               | Saturation (SE/SR)                  | Value: [0.1, 1.9]                | Increase or Decrease Saturation                   |
|                               | Box Filter (BX)                     | Kernal: [1, 10]                  | Smooth images via Box Filter                      |
|                               | Gaussian Blur (GB)                  | Kernal: [1, 10]                  | Blur images via Gaussian Filter                   |
|                               | Log Transform (LT)                  | Value: [27, 50]                  | Enhance Low Gray part of images                   |
|                               | Gamma Correct (GC)                  | Value: [0.5, 1.5]                | Adjust exposure of images                         |
|                               | Gaussian Sharpen (GS)               | Value: [0.5, 1.5]                | Enhance Edges                                     |
|                               | Bilateral Filter (BF)               | Sigma: [15, 105]                 | Enhance edges with Blur images                    |
|                               | Median Filter (DB)                  | Kernal: [1, 19]                  | Enhance edges with Shape images                   |
|                               | Wavelet Transformation (WT)         | LH: [0, 3] HH: [4, 6] HL: [7, 9] | Analyze signals in time-frequency domains         |
|                               | Perlin Noise (PN)                   | Octave level: [0, 9]             | Generate smooth, continuous, random-like patterns |
|                               | Dilate (DL)                         | Kernal: [0, 9]                   | Enlarge bright areas in images                    |
|                               | Erode (ED)                          | Kernal: [0, 9]                   | Shrink bright areas in binary images              |
|                               | Morphology Opening (OP)             | Kernal: [0, 9]                   | Erode, then Dilate                                |
|                               | Morphology Closing (CL)             | Kernal: [0, 9]                   | Dilate, then Erode                                |

Table 1: This table shows the composition of heterogeneous Action Space, including 22 rule-based methods and 10 learning-based methods, and their corresponding abbreviation
