# Supplementary material
Source: ML conference proceedings conference paper supplement (https://openaccess.thecvf.com/content/ICCV2025/html/Yi_Adapt_Foundational_Segmentation_ICCV_2025_paper.html)
Supplement: Supplementary file 2 [file FinalParadigmCropped.pdf › Augment2AdaptSupplimentaryMaterial/FinalParadigmCropped.pdf]

**Step3:** Put augmented image into foundational segmentation model to calculate reward.

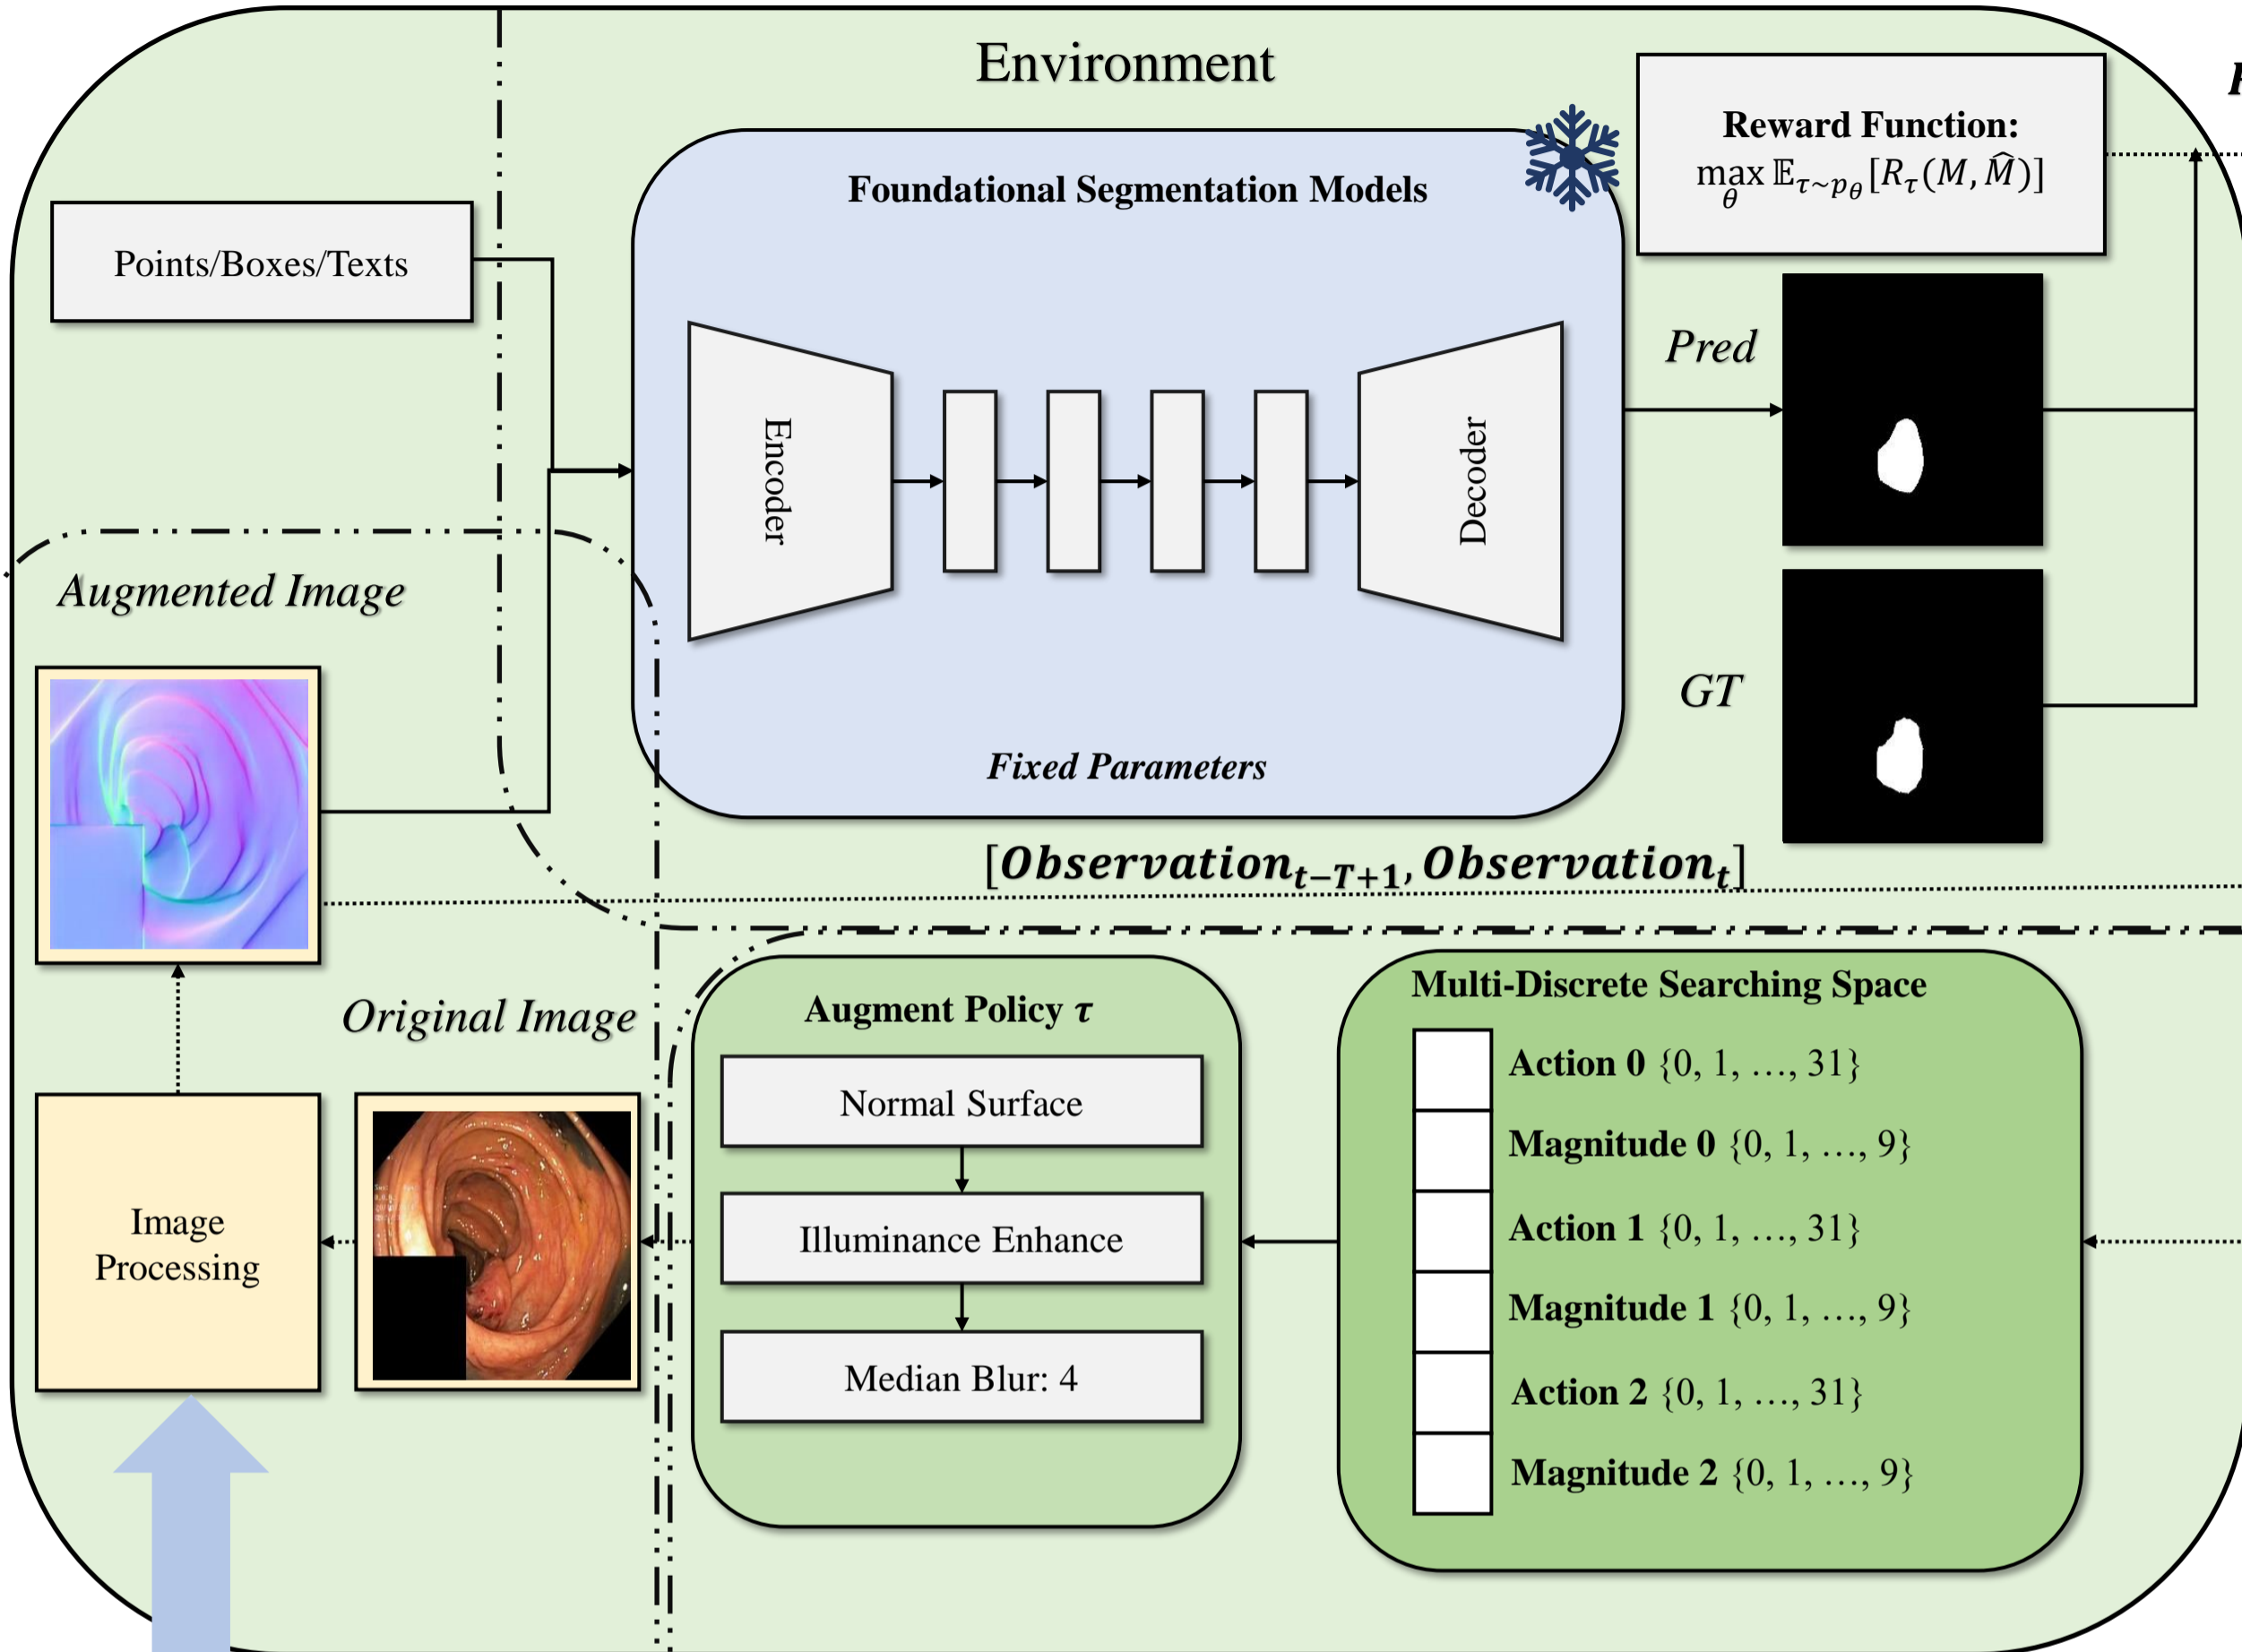

**Step2:** Follow action to augment image.

**Step1:** Map methods selected from Heterogeneous Searching Space.

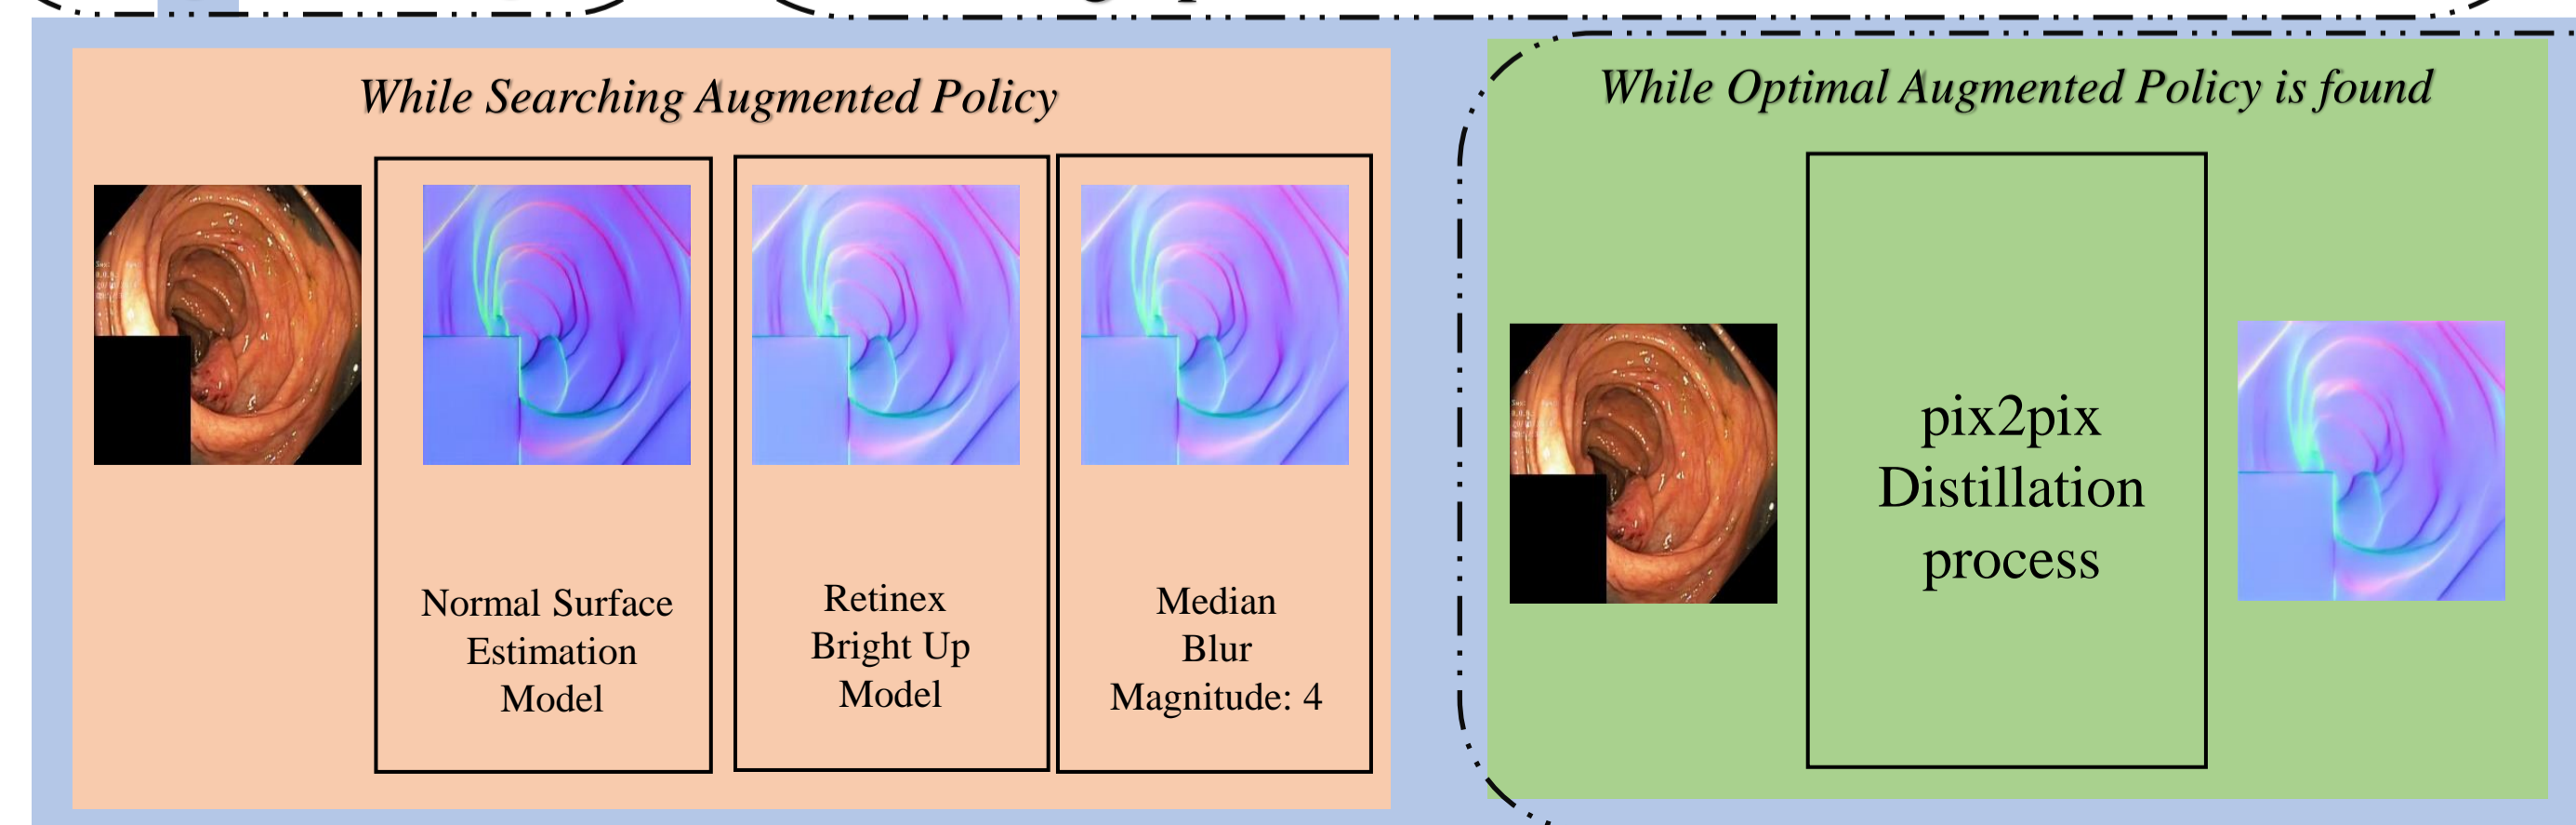

**Reward<sub>t</sub>**

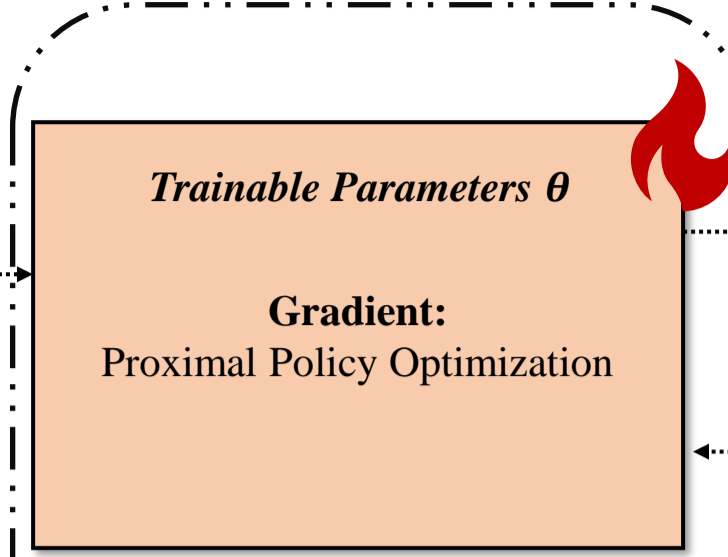

**Step4:** Predict next Action and get back to step 1.

**Observation<sub>t</sub>**

**Action<sub>t+1</sub>**

LSTM

Searching Space

**Action<sub>t</sub>**

17  
-  
21  
-  
15  
4

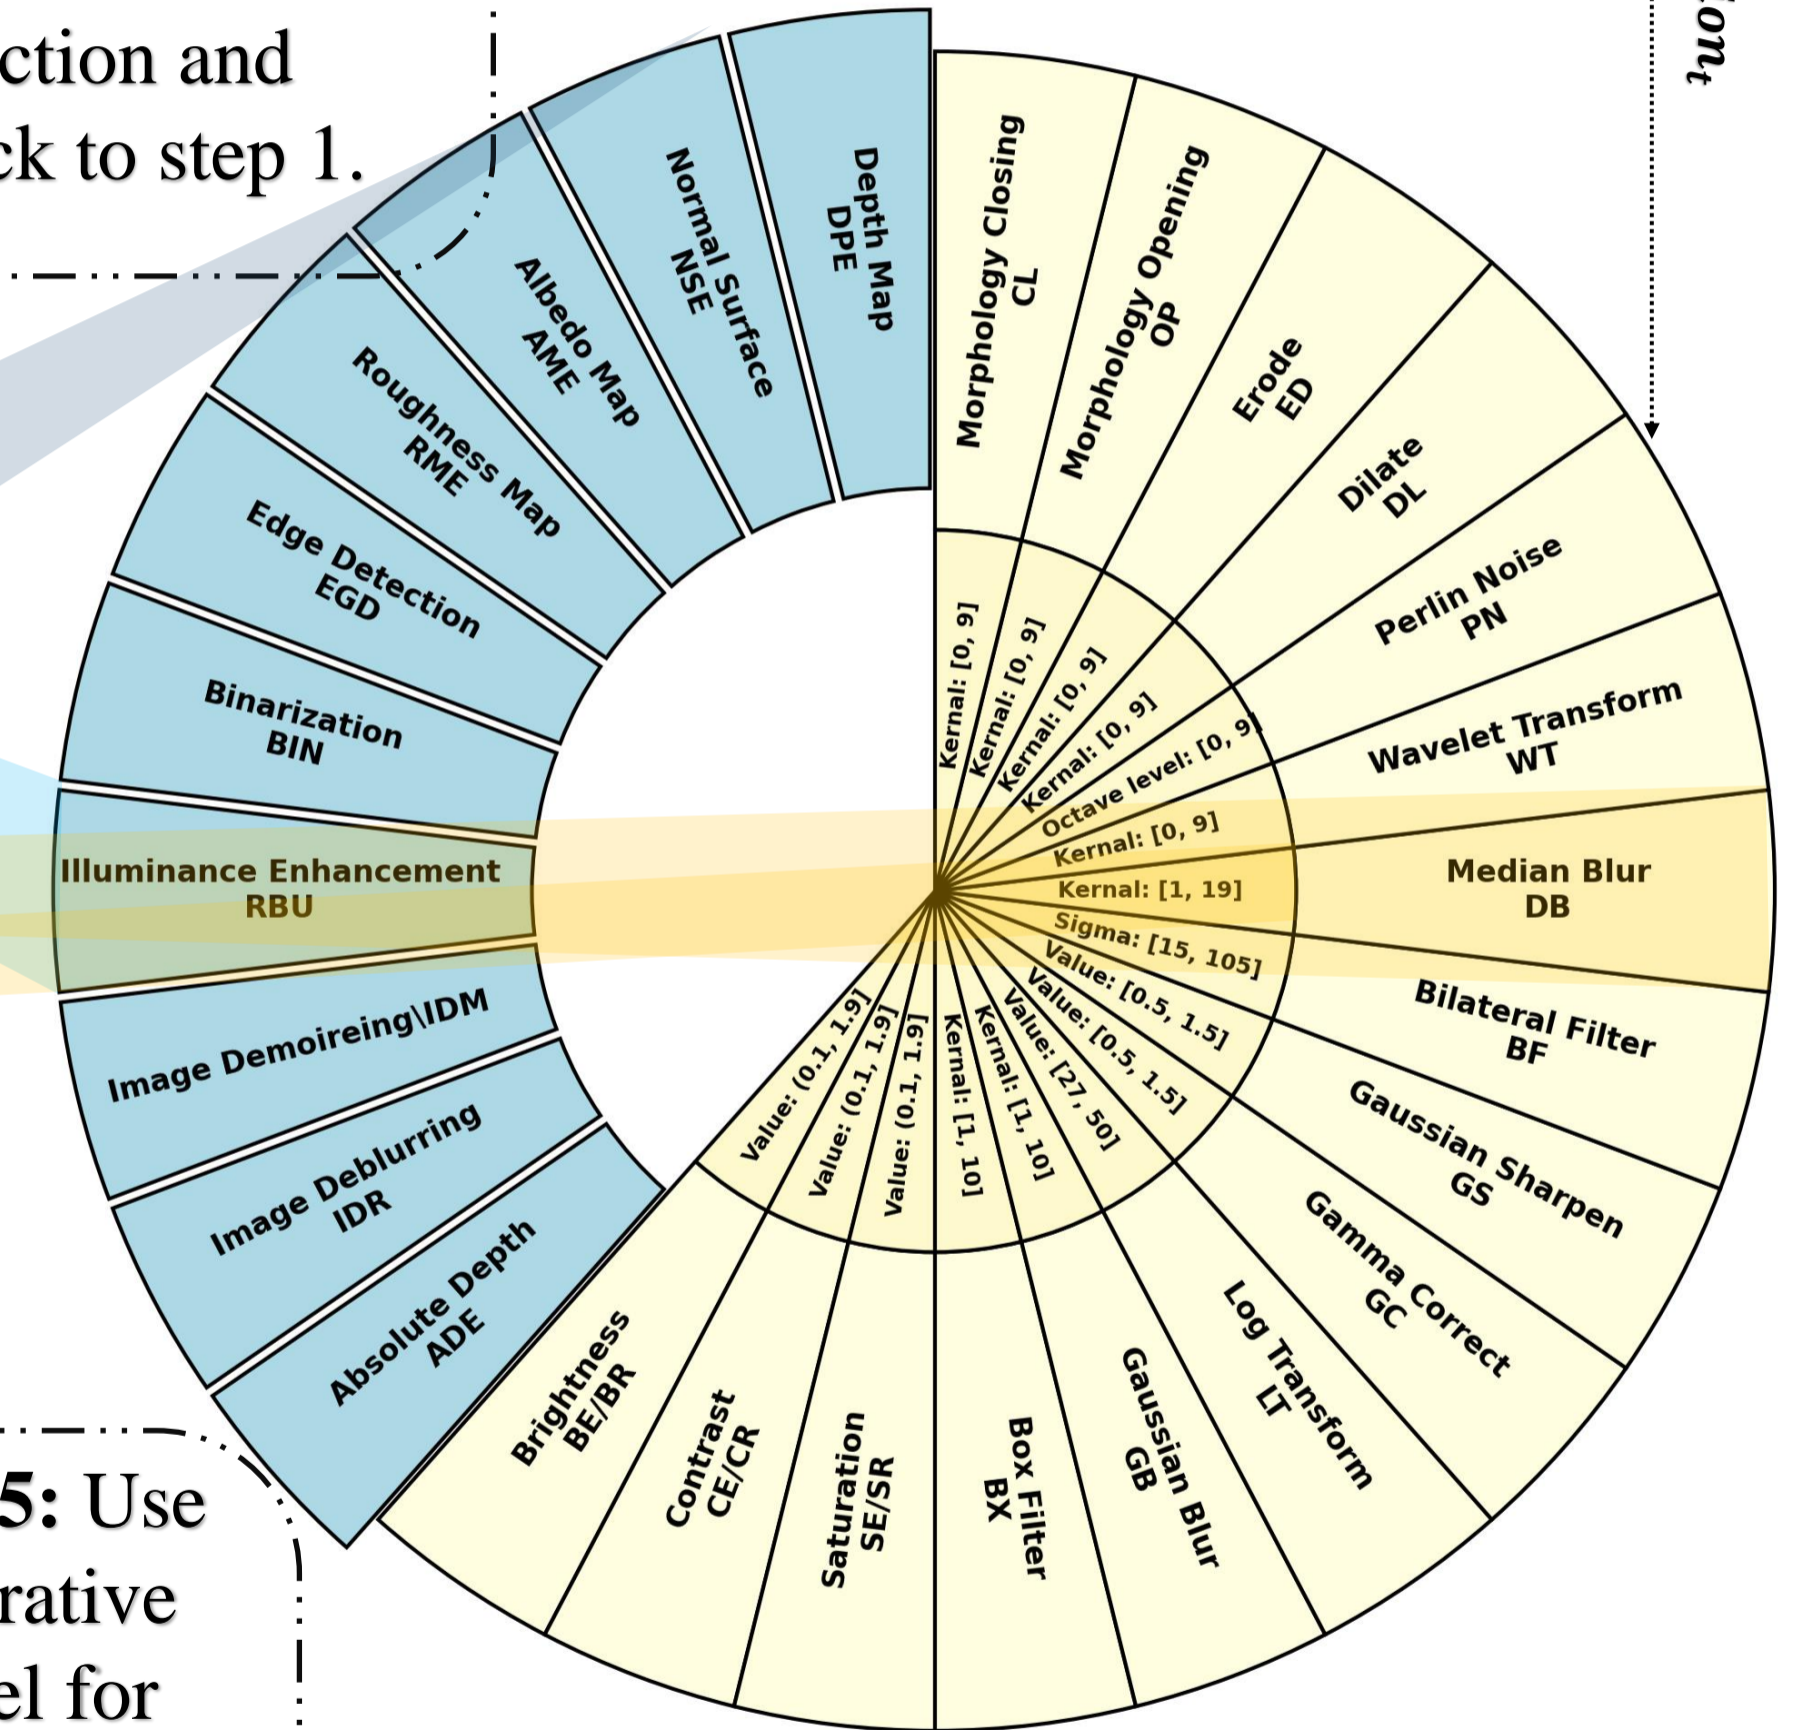

**Step5:** Use generative model for augmentation.

Heterogeneous Action Space consists of 10 kinds of learning-based methods without magnitude and 22 kinds of rule-based methods with corresponding magnitudes.
