# Supplementary material
Source: ML conference proceedings conference paper supplement (https://openaccess.thecvf.com/content/ICCV2025/html/Yi_Adapt_Foundational_Segmentation_ICCV_2025_paper.html)

*Original*

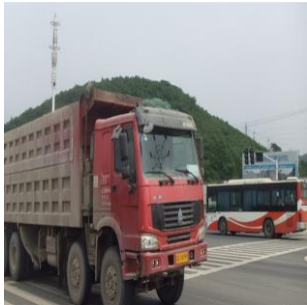

*Original Pred*

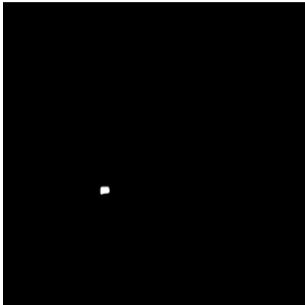

*Augmented*

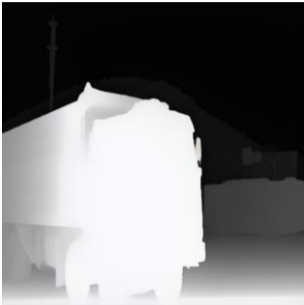

*Augmented Pred*

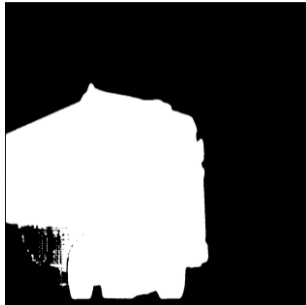

Supplement: Supplementary file 3 [file ImgA_C.pdf › Augment2AdaptSupplimentaryMaterial/ImgA_C.pdf]

*Original*

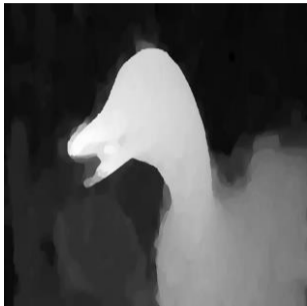

*Original Pred*

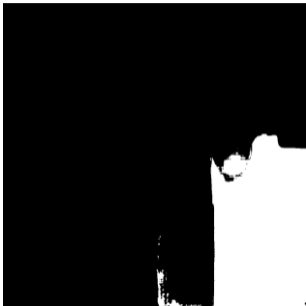

*Augmented*

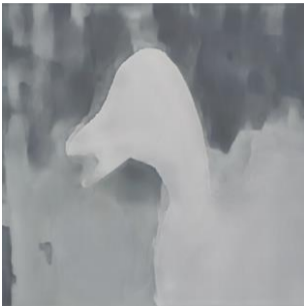

*Augmented Pred*

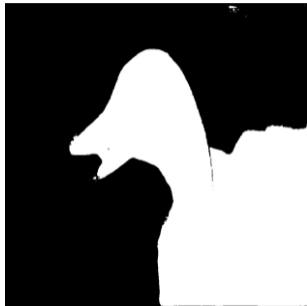

Supplement: Supplementary file 4 [file ImgB_C.pdf › Augment2AdaptSupplimentaryMaterial/ImgB_C.pdf]

*Original*

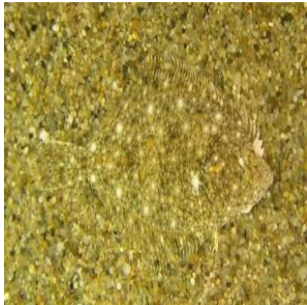

*Original Pred*

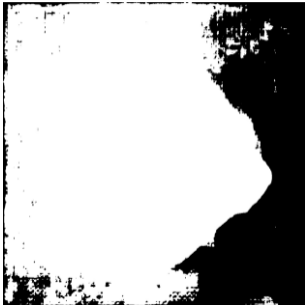

*Augmented*

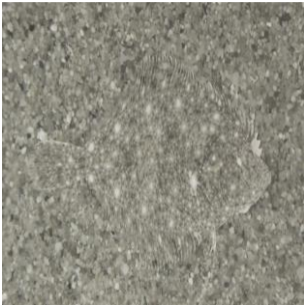

*Augmented Pred*

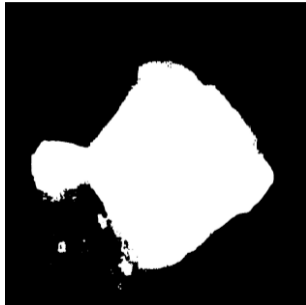

Supplement: Supplementary file 5 [file ImgC_C.pdf › Augment2AdaptSupplimentaryMaterial/ImgC_C.pdf]

*Original*

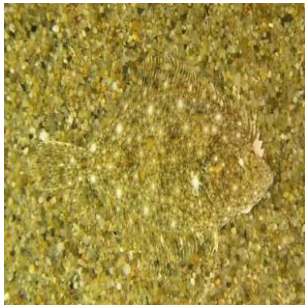

*Original Pred*

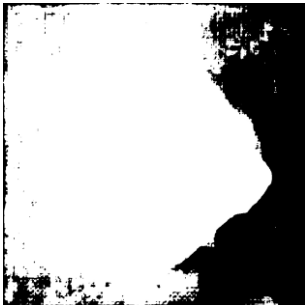

*Augmented*

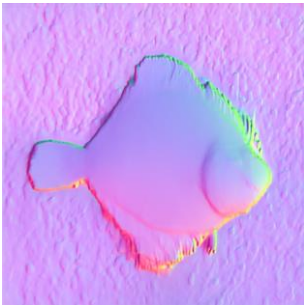

*Augmented Pred*

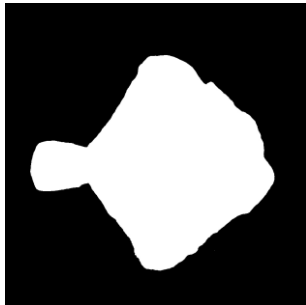

Supplement: Supplementary file 6 [file ImgD_C.pdf › Augment2AdaptSupplimentaryMaterial/ImgD_C.pdf]

*Original*

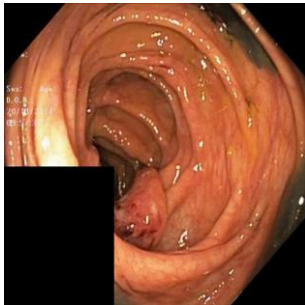

*Original Pred*

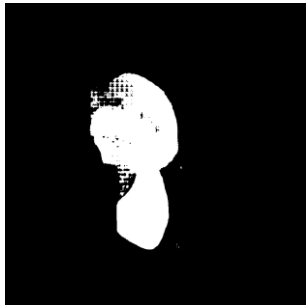

*Augmented*

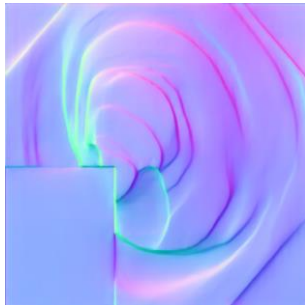

*Augmented Pred*

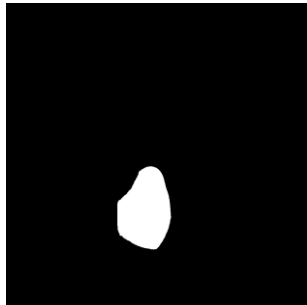

Supplement: Supplementary file 7 [file ImgE_C.pdf › Augment2AdaptSupplimentaryMaterial/ImgE_C.pdf]

*Original*

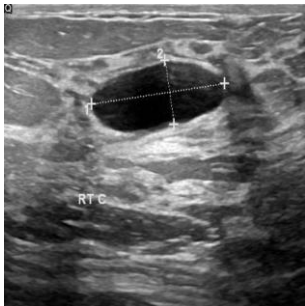

*Original Pred*

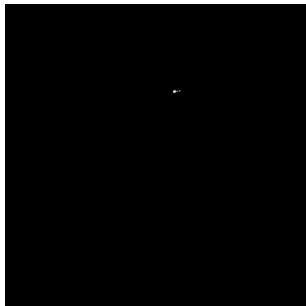

*Augmented*

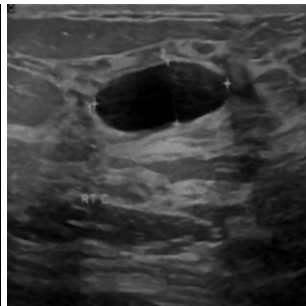

*Augmented Pred*

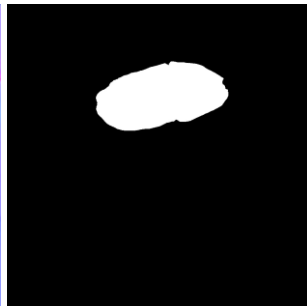

Supplement: Supplementary file 8 [file ImgF_C.pdf › Augment2AdaptSupplimentaryMaterial/ImgF_C.pdf]

*Original*

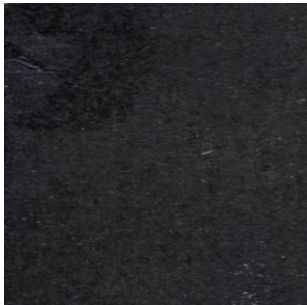

*Original Pred*

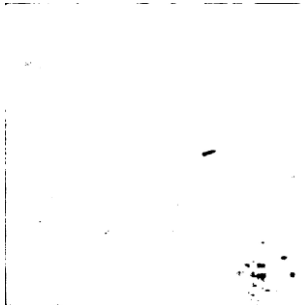

*Augmented*

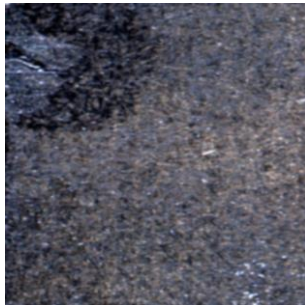

*Augmented Pred*

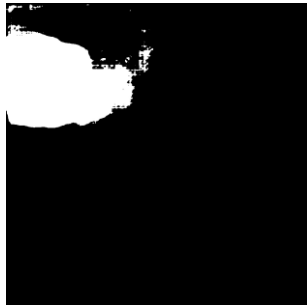

Supplement: Supplementary file 9 [file ImgG_C.pdf › Augment2AdaptSupplimentaryMaterial/ImgG_C.pdf]

*Original*

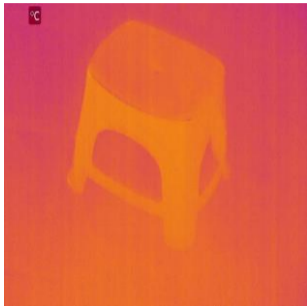

*Original Pred*

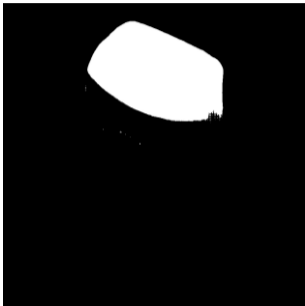

*Augmented*

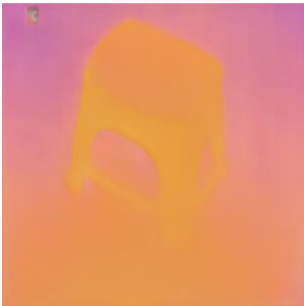

*Augmented Pred*

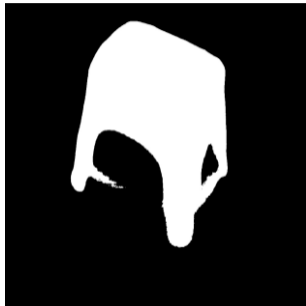

Supplement: Supplementary file 10 [file ImgH_C.pdf › Augment2AdaptSupplimentaryMaterial/ImgH_C.pdf]

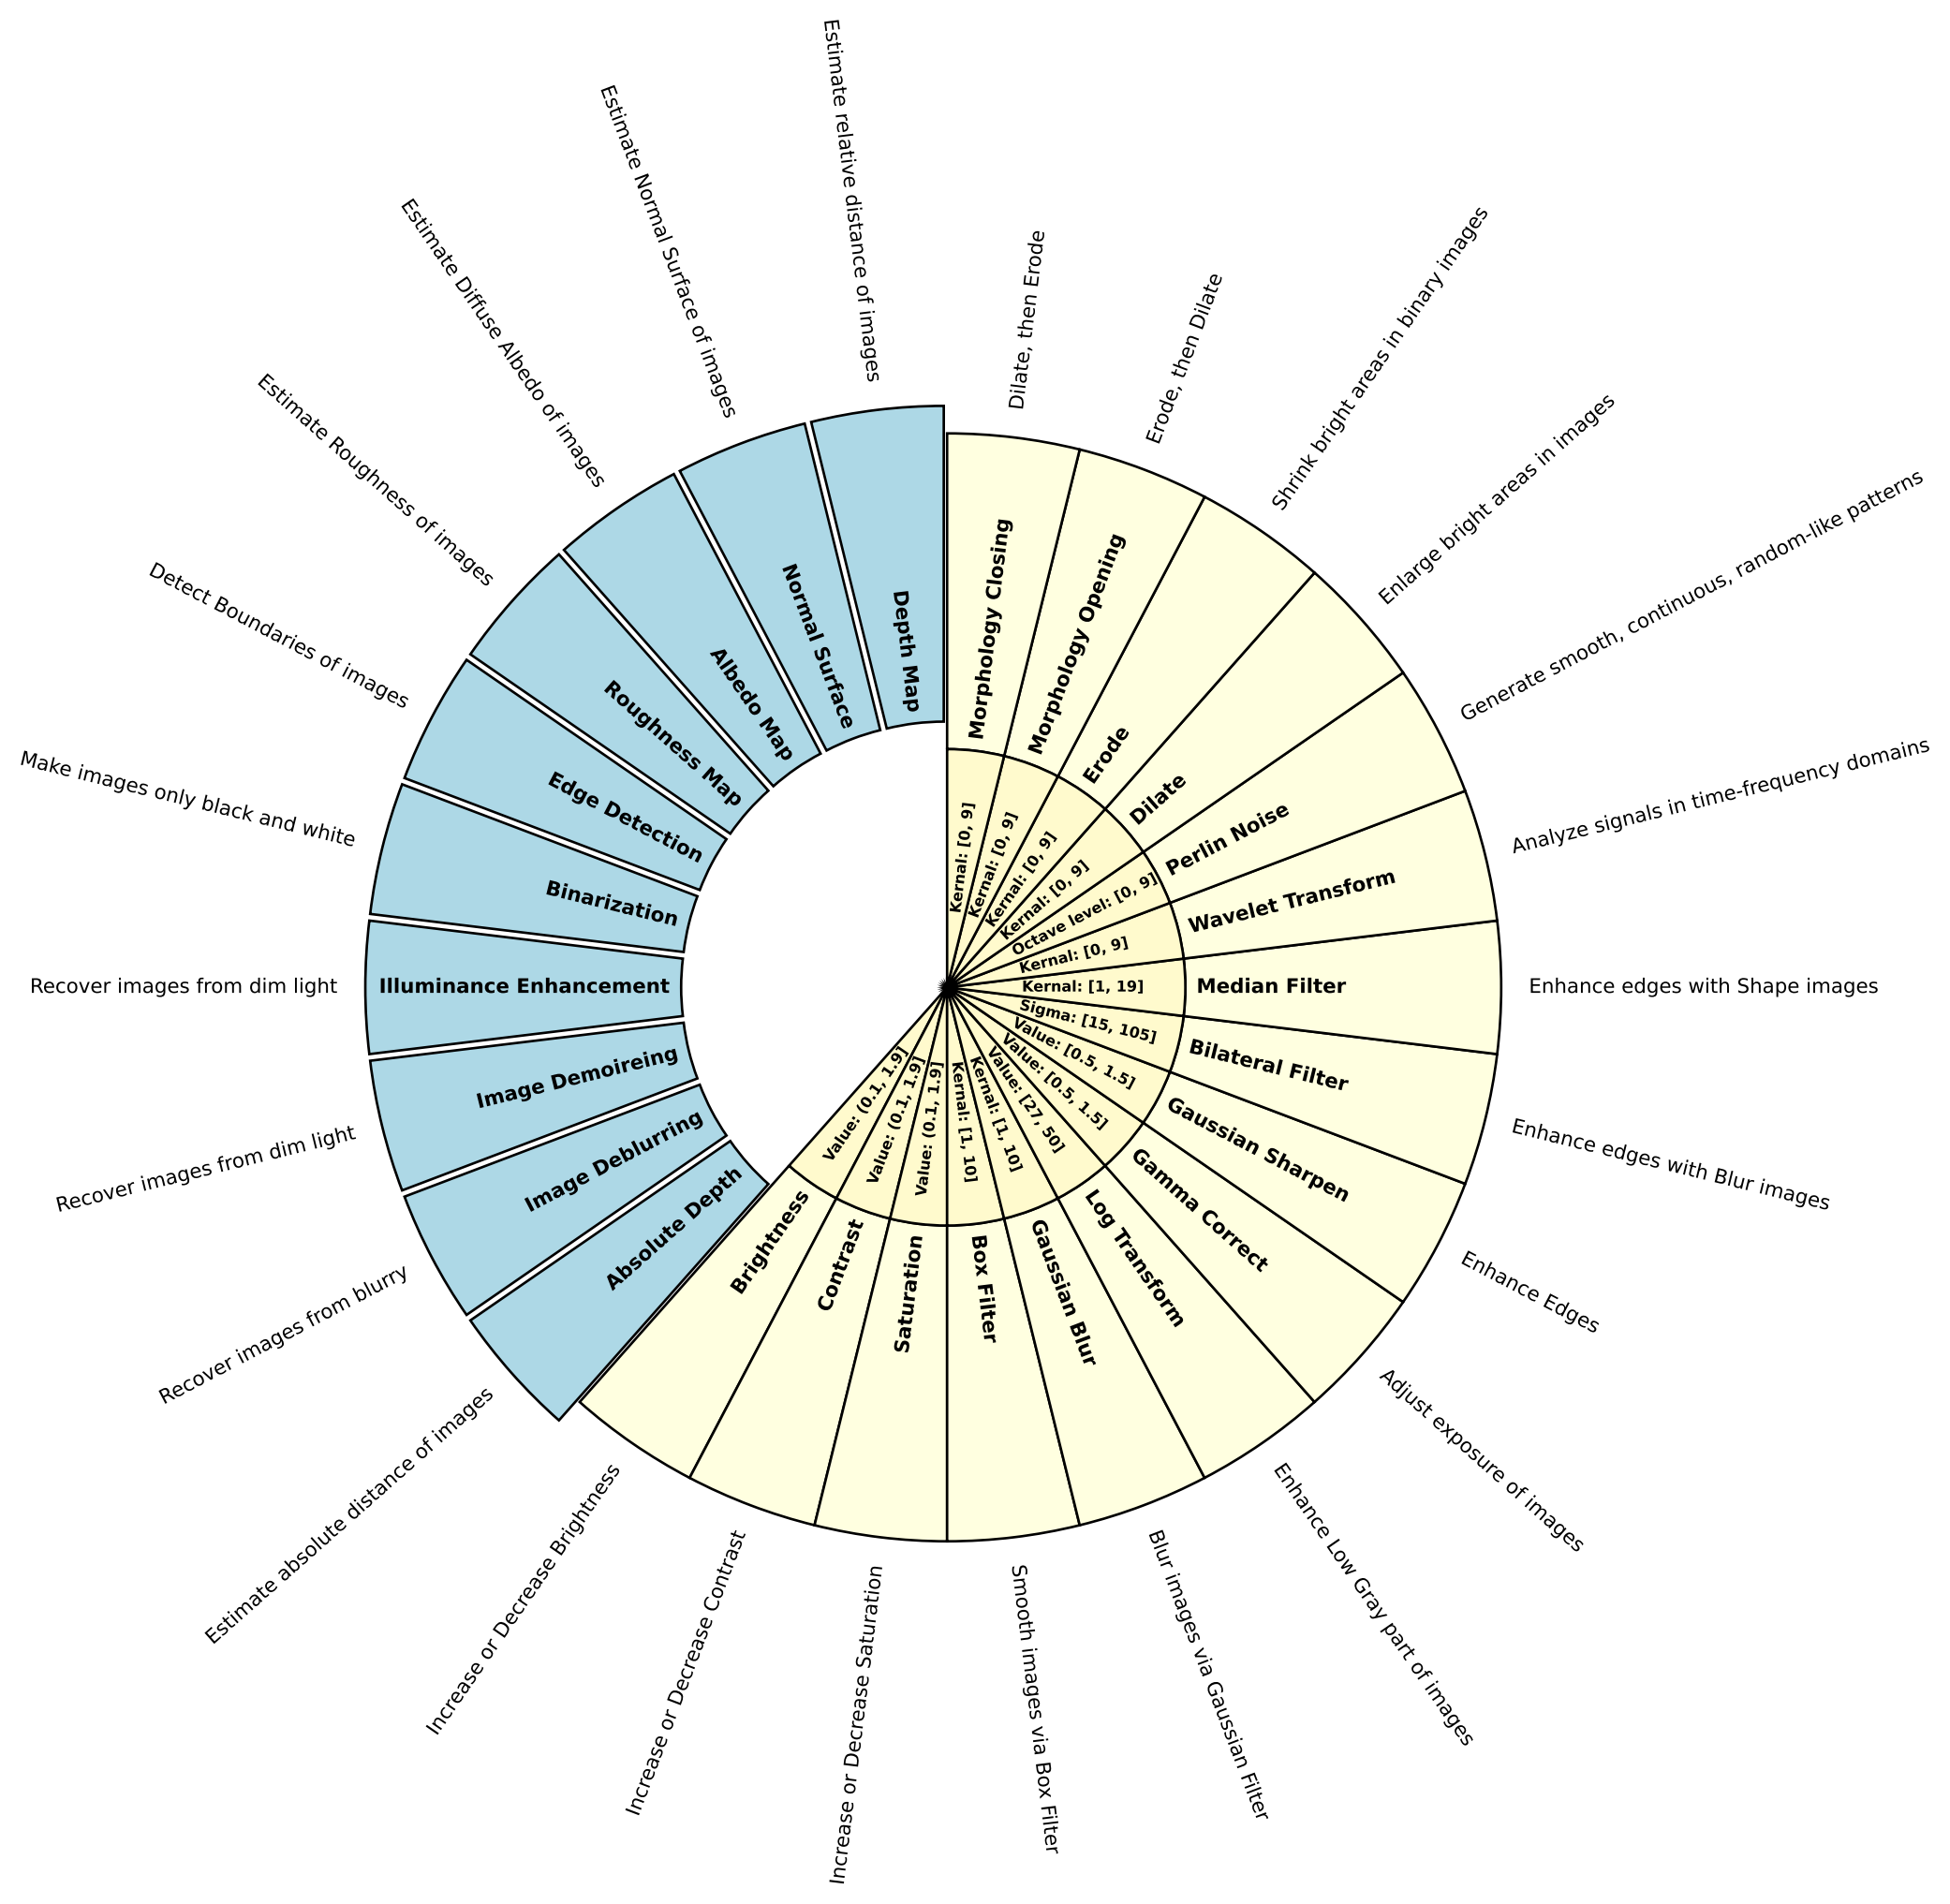

Supplement: Supplementary file 11 [file pie_chart_Action_Space_with_description.pdf › Augment2AdaptSupplimentaryMaterial/pie_chart_Action_Space_with_description.pdf]

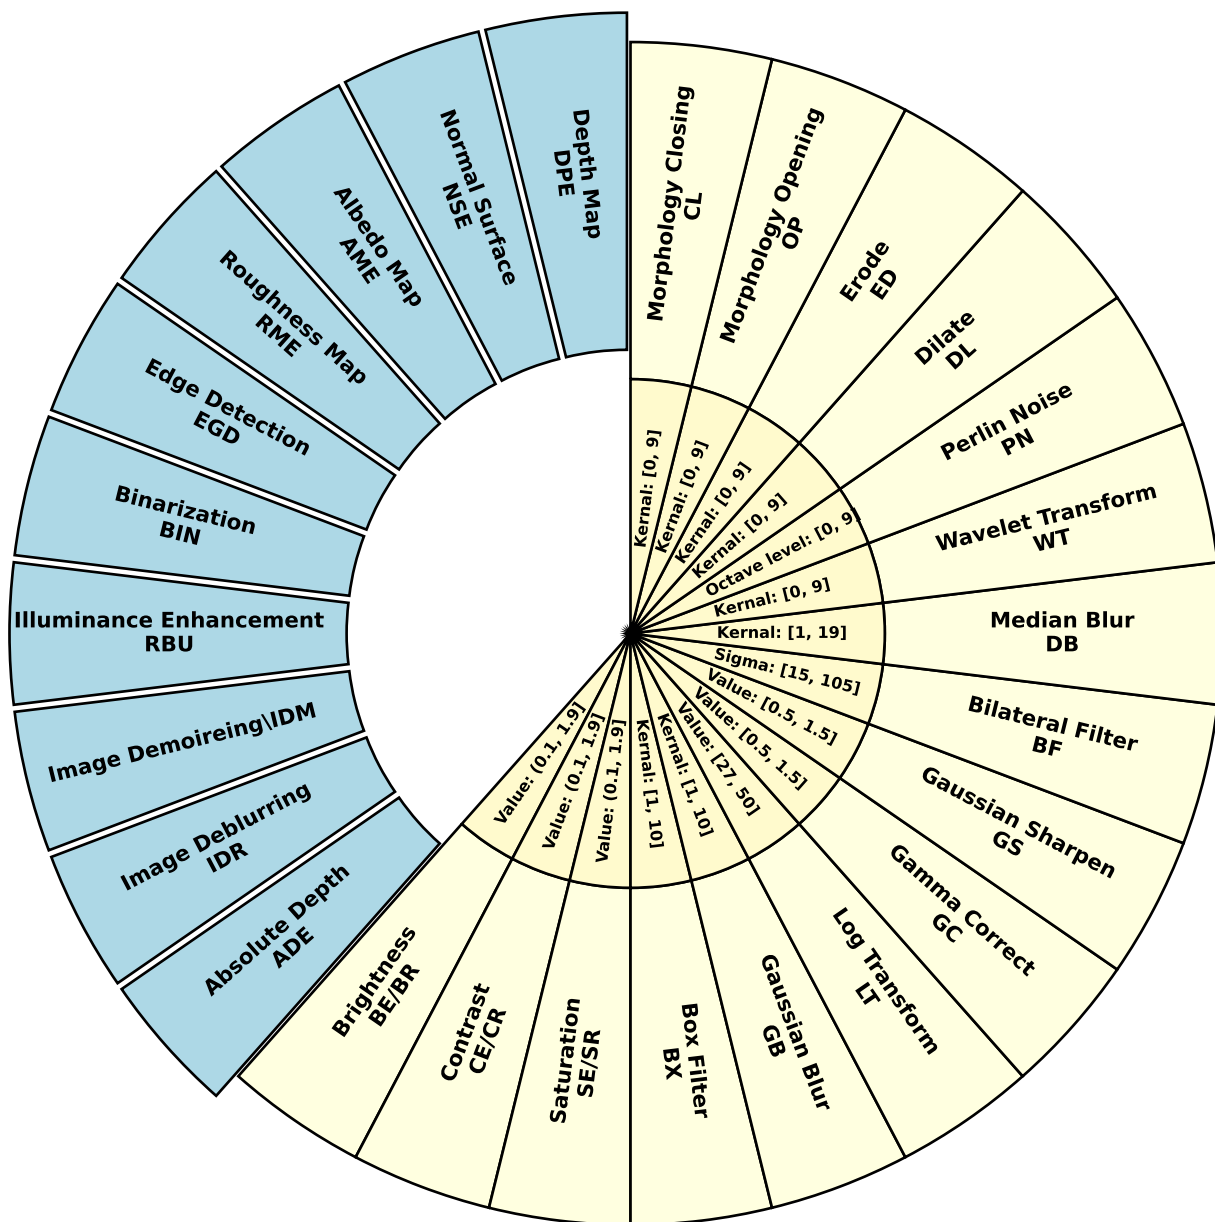

Supplement: Supplementary file 12 [file pie_chart_Action_Space_without_description.pdf › Augment2AdaptSupplimentaryMaterial/pie_chart_Action_Space_without_description.pdf]
